# Supplementary material
Source: Springer Nature journal article supplement (https://www.springermedizin.de/resource/supplementary/12984_2007_141_MOESM3_ESM.pdf/9605388)

Regular (Eupneic) Breath

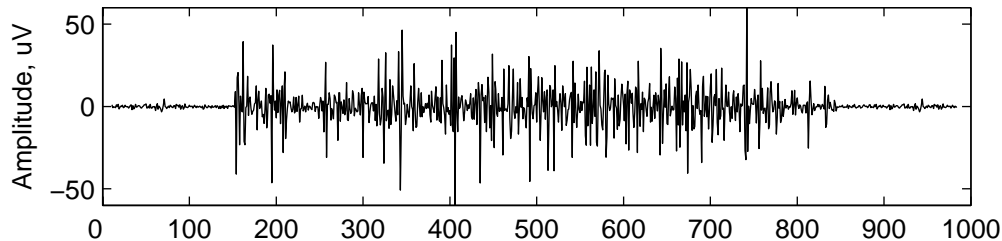

Early Recovery Breath

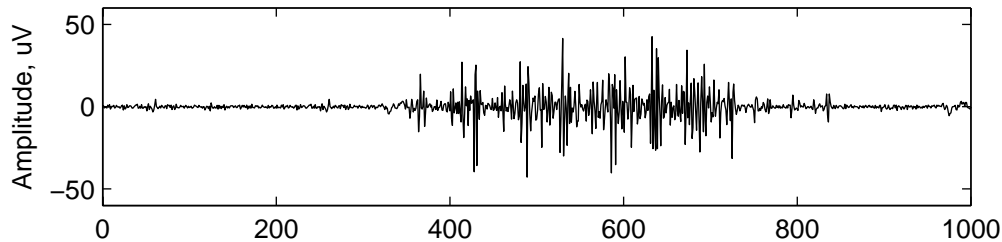

Recovered Breath

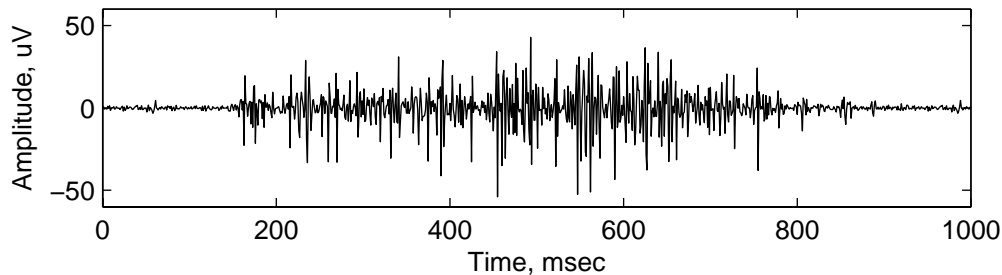

Supplement: MOESM3 [file 9605388]
